# Supplementary material
Source: ML conference proceedings conference paper supplement (https://proceedings.mlr.press/v89/lian19a.html)
Supplement: Supplementary file [file lian19a-supp.pdf]

## Supplementary Materials

### A Proofs

#### Lemma 4

If

$$r_{k+1} \leq (1 - C_1 k^{-a})r_k + C_2(k^{-2a+\varepsilon} + k^{-2\gamma+a+\varepsilon}), \quad (10)$$

for any constant  $1 > C_1 > 0, C_2 > 0, 1 > a > 0, 1 - a > \varepsilon > 0$ , there exists a constant  $\varepsilon$  such that

$$r_{k+1} \leq (k^{-2\gamma+2a+\varepsilon} + k^{-a+\varepsilon})\varepsilon.$$

**Proof to Lemma 4** First we expand the recursion relation (10) till  $k = 1$ :

$$\begin{aligned} r_{k+1} &\leq (1 - C_1 k^{-a})r_k + C_2(k^{-2a+\varepsilon} + k^{-2\gamma+a+\varepsilon}) \\ &\leq \left( \prod_{\varkappa=1}^k (1 - C_1 \varkappa^{-a}) \right) r_1 + C_2 \left( \sum_{\varkappa=1}^k (\varkappa^{-2a+\varepsilon} + \varkappa^{-2\gamma+a+\varepsilon}) \left( \prod_{\hat{k}=\varkappa+1}^k (1 - C_1 \hat{k}^{-a}) \right) \right). \end{aligned} \quad (11)$$

As the first step to bound (11), we use the monotonicity of the  $\ln(\cdot)$  function to bound the form  $\prod_{\hat{k}=m}^k (1 - C_1 \hat{k}^{-a})$  for some  $m$ . Notice that

$$\ln \left( \prod_{\hat{k}=m}^k (1 - C_1 \hat{k}^{-a}) \right) = \sum_{\hat{k}=m}^k \ln(1 - C_1 \hat{k}^{-a}) \leq -C_1 \sum_{\hat{k}=m}^k \hat{k}^{-a}.$$

Then it follows from the monotonicity of  $\ln(\cdot)$  that:

$$\prod_{\hat{k}=m}^k (1 - C_1 \hat{k}^{-a}) \leq \exp \left( -C_1 \sum_{\hat{k}=m}^k \hat{k}^{-a} \right) \leq \exp(-C_1(k - m + 1)k^{-a}). \quad (12)$$

Using this inequality (11) can be bounded by the following inequality:

$$\begin{aligned} r_{k+1} &\leq \left( \prod_{\varkappa=1}^k (1 - C_1 \varkappa^{-a}) \right) r_1 + C_2 \left( \sum_{\varkappa=1}^k (\varkappa^{-2a+\varepsilon} + \varkappa^{-2\gamma+a+\varepsilon}) \left( \prod_{\hat{k}=\varkappa+1}^k (1 - C_1 \hat{k}^{-a}) \right) \right) \\ &\stackrel{(12)}{\leq} \underbrace{\exp(-k^{1-a})r_1 + C_2 \left( \sum_{\varkappa=1}^k (\varkappa^{-2a+\varepsilon} + \varkappa^{-2\gamma+a+\varepsilon}) \exp(-C_1(k - \varkappa)k^{-a}) \right)}_{=: T_k}. \end{aligned} \quad (13)$$

The final step will be bounding  $T_k$  above. The term can actually be bounded by a power of reciprocal function. Notice that for any  $1 - a > \varepsilon > 0$ , we have the following inequality:

$$\begin{aligned} T_k &= C_2 \sum_{\varkappa=1}^k (\varkappa^{-2a+\varepsilon} + \varkappa^{-2\gamma+a+\varepsilon}) \exp(-C_1(k - \varkappa)k^{-a}) \\ &\leq C_2 \sum_{\varkappa=1}^{k - \lfloor k^{a+\varepsilon} \rfloor} (\varkappa^{-2a+\varepsilon} + \varkappa^{-2\gamma+a+\varepsilon}) \exp(-C_1 \lfloor k^{a+\varepsilon} \rfloor k^{-a}) + C_2 \sum_{\varkappa=k - \lfloor k^{a+\varepsilon} \rfloor + 1}^k (\varkappa^{-2a+\varepsilon} + \varkappa^{-2\gamma+a+\varepsilon}) \\ &= O(\exp(-C_1 \lfloor k^{a+\varepsilon} \rfloor k^{-a})) + O(k^{a+\varepsilon}(k^{-2a+\varepsilon} + k^{-2\gamma+a+\varepsilon})) = O(k^{-2\gamma+2a+\varepsilon} + k^{-a+\varepsilon}), \end{aligned}$$

where  $O(\cdot)$  notation is used to ignore any constant terms to simplify the notation. It immediately follows from (13) that there exists a constant  $\varepsilon$  such that for any  $1 - a > \varepsilon > 0$ , the following inequality holds:

$$r_{k+1} \leq (k^{-2\gamma+2a+\varepsilon} + k^{-a+\varepsilon})\varepsilon.$$

**Proof to Lemma 1** First note that for any  $\alpha_k \in [0, 1]$ , the following identity always holds for the difference between the estimation and the true expectation. The first step comes from the update rule in Algorithm 2.

$$\begin{aligned}
 & \hat{e}_n^{(k+1)} - \mathbb{E}_\xi \mathbf{e}_n(x^{(k)}; \xi) \\
 &= (1 - \alpha_k) \hat{e}_n^{(k)} + \alpha_k \hat{\mathbf{e}}_n(x^{(k)}; \xi_k; \hat{e}^{(k)}) - \mathbb{E}_\xi \mathbf{e}_n(x^{(k)}; \xi) \\
 &= (1 - \alpha_k) (\hat{e}_n^{(k)} - \mathbb{E}_\xi \mathbf{e}_n(x^{(k)}; \xi)) + \alpha_k (\hat{\mathbf{e}}_n(x^{(k)}; \xi_k; \hat{e}^{(k)}) - \mathbb{E}_\xi \mathbf{e}_n(x^{(k)}; \xi)) \\
 &= (1 - \alpha_k) (\hat{e}_n^{(k)} - \mathbb{E}_\xi \mathbf{e}_n(x^{(k-1)}; \xi)) + \alpha_k (\hat{\mathbf{e}}_n(x^{(k)}; \xi_k; \hat{e}^{(k)}) - \mathbb{E}_\xi \mathbf{e}_n(x^{(k)}; \xi)) \\
 &\quad - (1 - \alpha_k) (\mathbb{E}_\xi \mathbf{e}_n(x^{(k)}; \xi) - \mathbb{E}_\xi \mathbf{e}_n(x^{(k-1)}; \xi)). \tag{14}
 \end{aligned}$$

Then take  $\ell_2$  norm on both sides. The second step comes from the fact that  $n$  is the last layer's index, so  $\mathbf{e}_n(x; \xi) = \hat{\mathbf{e}}_n(x^{(k)}; \xi; \hat{e}^{(k)})$ .

$$\begin{aligned}
 & \mathbb{E} \|\hat{e}_n^{(k+1)} - \mathbb{E}_\xi \mathbf{e}_n(x^{(k)}; \xi)\|^2 \\
 &= \mathbb{E} \left\| \begin{array}{c} (1 - \alpha_k) (\hat{e}_n^{(k)} - \mathbb{E}_\xi \mathbf{e}_n(x^{(k-1)}; \xi)) \\ + \alpha_k (\hat{\mathbf{e}}_n(x^{(k)}; \xi_k; \hat{e}^{(k)}) - \mathbb{E}_\xi \mathbf{e}_n(x^{(k)}; \xi)) \\ - (1 - \alpha_k) (\mathbb{E}_\xi \mathbf{e}_n(x^{(k)}; \xi) - \mathbb{E}_\xi \mathbf{e}_n(x^{(k-1)}; \xi)) \end{array} \right\|^2 \\
 &= \mathbb{E} \left\| \begin{array}{c} (1 - \alpha_k) (\hat{e}_n^{(k)} - \mathbb{E}_\xi \mathbf{e}_n(x^{(k-1)}; \xi)) \\ + \alpha_k (\mathbf{e}_n(x^{(k)}; \xi_k) - \mathbb{E}_\xi \mathbf{e}_n(x^{(k)}; \xi)) \\ - (1 - \alpha_k) (\mathbb{E}_\xi \mathbf{e}_n(x^{(k)}; \xi) - \mathbb{E}_\xi \mathbf{e}_n(x^{(k-1)}; \xi)) \end{array} \right\|^2 \\
 &= (1 - \alpha_k)^2 \mathbb{E} \left\| \begin{array}{c} \hat{e}_n^{(k)} - \mathbb{E}_\xi \mathbf{e}_n(x^{(k-1)}; \xi) \\ - (\mathbb{E}_\xi \mathbf{e}_n(x^{(k)}; \xi) - \mathbb{E}_\xi \mathbf{e}_n(x^{(k-1)}; \xi)) \end{array} \right\|^2 + \alpha_k^2 \mathbb{E} \|\mathbf{e}_n(x^{(k)}; \xi_k) - \mathbb{E}_\xi \mathbf{e}_n(x^{(k)}; \xi)\|^2 \\
 &\quad + 2(1 - \alpha_k) \alpha_k \mathbb{E} \left\langle \begin{array}{c} \hat{e}_n^{(k)} - \mathbb{E}_\xi \mathbf{e}_n(x^{(k-1)}; \xi) \\ - (\mathbb{E}_\xi \mathbf{e}_n(x^{(k)}; \xi) - \mathbb{E}_\xi \mathbf{e}_n(x^{(k-1)}; \xi)) \end{array}, \mathbf{e}_n(x^{(k)}; \xi_k) - \mathbb{E}_\xi \mathbf{e}_n(x^{(k)}; \xi) \right\rangle \\
 &= (1 - \alpha_k)^2 \mathbb{E} \left\| \begin{array}{c} \hat{e}_n^{(k)} - \mathbb{E}_\xi \mathbf{e}_n(x^{(k-1)}; \xi) \\ - (\mathbb{E}_\xi \mathbf{e}_n(x^{(k)}; \xi) - \mathbb{E}_\xi \mathbf{e}_n(x^{(k-1)}; \xi)) \end{array} \right\|^2 + \alpha_k^2 \mathbb{E} \|\mathbf{e}_n(x^{(k)}; \xi_k) - \mathbb{E}_\xi \mathbf{e}_n(x^{(k)}; \xi)\|^2 \\
 &\quad + 2(1 - \alpha_k) \alpha_k \mathbb{E} \left\langle \begin{array}{c} \hat{e}_n^{(k)} - \mathbb{E}_\xi \mathbf{e}_n(x^{(k-1)}; \xi) \\ - (\mathbb{E}_\xi \mathbf{e}_n(x^{(k)}; \xi) - \mathbb{E}_\xi \mathbf{e}_n(x^{(k-1)}; \xi)) \end{array}, \underbrace{\mathbb{E}_{\xi_k} \mathbf{e}_n(x^{(k)}; \xi_k) - \mathbb{E}_\xi \mathbf{e}_n(x^{(k)}; \xi)}_{=0} \right\rangle \\
 &\stackrel{\text{Assumption 1-2}}{\leq} \underbrace{(1 - \alpha_k)^2 \mathbb{E} \left\| \begin{array}{c} \hat{e}_n^{(k)} - \mathbb{E}_\xi \mathbf{e}_n(x^{(k-1)}; \xi) \\ - (\mathbb{E}_\xi \mathbf{e}_n(x^{(k)}; \xi) - \mathbb{E}_\xi \mathbf{e}_n(x^{(k-1)}; \xi)) \end{array} \right\|^2}_{=: \mathcal{F}_1} + \alpha_k^2 \sigma^2. \tag{15}
 \end{aligned}$$

The second term is bounded by the bounded variance assumption. We denote the first term as  $\mathcal{F}_1$  and bound it separately. With the fact that  $\|x + y\|^2 \leq (1 + \vartheta) \|x\|^2 + (1 + \frac{1}{\vartheta}) \|y\|^2, \forall \vartheta \in (0, 1), \forall x, \forall y$  we can bound  $\mathcal{F}_1$  as following:

$$\begin{aligned}
 \mathcal{F}_1 &= (1 - \alpha_k)^2 \mathbb{E} \left\| \begin{array}{c} (\hat{e}_n^{(k)} - \mathbb{E}_\xi \mathbf{e}_n(x^{(k-1)}; \xi)) \\ - (\mathbb{E}_\xi \mathbf{e}_n(x^{(k)}; \xi) - \mathbb{E}_\xi \mathbf{e}_n(x^{(k-1)}; \xi)) \end{array} \right\|^2 \\
 &\leq (1 - \alpha_k)^2 \left( (1 + \vartheta) \mathbb{E} \|\hat{e}_n^{(k)} - \mathbb{E}_\xi \mathbf{e}_n(x^{(k-1)}; \xi)\|^2 + \left(1 + \frac{1}{\vartheta}\right) \mathbb{E} \|\mathbb{E}_\xi \mathbf{e}_n(x^{(k)}; \xi) - \mathbb{E}_\xi \mathbf{e}_n(x^{(k-1)}; \xi)\|^2 \right), \forall \vartheta \in (0, 1) \\
 &\stackrel{\vartheta \leftarrow \alpha_k}{=} (1 - \alpha_k)^2 (1 + \alpha_k) \mathbb{E} \|\hat{e}_n^{(k)} - \mathbb{E}_\xi \mathbf{e}_n(x^{(k-1)}; \xi)\|^2 + \left( \frac{(1 + \alpha_k)(1 - \alpha_k)^2}{\alpha_k} \right) \mathbb{E} \|\mathbb{E}_\xi \mathbf{e}_n(x^{(k)}; \xi) - \mathbb{E}_\xi \mathbf{e}_n(x^{(k-1)}; \xi)\|^2 \\
 &\leq (1 - \alpha_k) \mathbb{E} \|\hat{e}_n^{(k)} - \mathbb{E}_\xi \mathbf{e}_n(x^{(k-1)}; \xi)\|^2 + \frac{1}{\alpha_k} \mathbb{E} \|\mathbb{E}_\xi \mathbf{e}_n(x^{(k)}; \xi) - \mathbb{E}_\xi \mathbf{e}_n(x^{(k-1)}; \xi)\|^2 \\
 &\stackrel{\text{Assumption 1-4}}{\leq} (1 - \alpha_k) \mathbb{E} \|\hat{e}_n^{(k)} - \mathbb{E}_\xi \mathbf{e}_n(x^{(k-1)}; \xi)\|^2 + \frac{1}{\alpha_k} L \mathbb{E} \|x^{(k)} - x^{(k-1)}\|^2. \tag{16}
 \end{aligned}$$

The last step comes from the Lipschitzian assumption on the functions.

Putting (16) back into (15) we obtain

$$\mathbb{E}\|\hat{e}_n^{(k+1)} - \mathbb{E}_\xi \mathbf{e}_n(x^{(k)}; \xi)\|^2 \leq (1 - \alpha_k) \mathbb{E}\|\hat{e}_n^{(k)} - \mathbb{E}_\xi \mathbf{e}_n(x^{(k-1)}; \xi)\|^2 + \frac{1}{\alpha_k} \underbrace{L \mathbb{E}\|x^{(k)} - x^{(k-1)}\|^2}_{=O(\gamma_{k-1}^2)} + \alpha_k^2 \sigma^2, \quad (17)$$

where the second term is of order  $O(\gamma_{k-1}^2)$  because the step length is  $\gamma_{k-1}$  for the  $(k-1)$ -th step and the gradient is bounded according to Assumption 1-1. For the case  $i = n$ , (8) directly follows from combining (17), Lemma 4 and Assumption 1-6.

We then prove (8) for all  $i$  by induction. Assuming for all  $p > i$  and for any  $1 - a > \epsilon > 0$  there exists a constant  $\mathcal{E}$  (8) holds such that

$$\mathbb{E}\|\hat{e}_p^{(k+1)} - \mathbb{E}_\xi \mathbf{e}_p(x^{(k)}; \xi)\|^2 \leq \mathcal{E}(k^{-2\gamma+2a+\epsilon} + k^{-a+\epsilon}). \quad (18)$$

Similar to (14) we can split the difference between the estimation and the expectation into three parts:

$$\begin{aligned} & \hat{e}_i^{(k+1)} - \mathbb{E}_\xi \mathbf{e}_i(x^{(k)}; \xi) \\ &= (1 - \alpha_k) \hat{e}_i^{(k)} + \alpha_k \hat{\mathbf{e}}_i(x^{(k)}; \xi_k; \hat{e}^{(k)}) - \mathbb{E}_\xi \mathbf{e}_i(x^{(k)}; \xi) \\ &= (1 - \alpha_k) (\hat{e}_i^{(k)} - \mathbb{E}_\xi \mathbf{e}_i(x^{(k-1)}; \xi)) + (1 - \alpha_k) \mathbb{E}_\xi \mathbf{e}_i(x^{(k-1)}; \xi) + \alpha_k \hat{\mathbf{e}}_i(x^{(k)}; \xi_k; \hat{e}^{(k)}) - \mathbb{E}_\xi \mathbf{e}_i(x^{(k)}; \xi) \\ &= (1 - \alpha_k) (\hat{e}_i^{(k)} - \mathbb{E}_\xi \mathbf{e}_i(x^{(k-1)}; \xi)) + (1 - \alpha_k) (\mathbb{E}_\xi \mathbf{e}_i(x^{(k-1)}; \xi) - \mathbb{E}_\xi \mathbf{e}_i(x^{(k)}; \xi)) \\ & \quad + \alpha_k (\hat{\mathbf{e}}_i(x^{(k)}; \xi_k; \hat{e}^{(k)}) - \mathbb{E}_\xi \mathbf{e}_i(x^{(k)}; \xi)), \end{aligned}$$

Taking the  $\ell_2$  norm on both sides we obtain

$$\begin{aligned} & \mathbb{E}\|\hat{e}_i^{(k+1)} - \mathbb{E}_\xi \mathbf{e}_i(x^{(k)}; \xi)\|^2 \\ & \leq \mathbb{E} \left\| \begin{array}{c} (1 - \alpha_k) (\hat{e}_i^{(k)} - \mathbb{E}_\xi \mathbf{e}_i(x^{(k-1)}; \xi)) \\ + (1 - \alpha_k) (\mathbb{E}_\xi \mathbf{e}_i(x^{(k-1)}; \xi) - \mathbb{E}_\xi \mathbf{e}_i(x^{(k)}; \xi)) \\ + \alpha_k (\hat{\mathbf{e}}_i(x^{(k)}; \xi_k; \hat{e}^{(k)}) - \mathbb{E}_\xi \mathbf{e}_i(x^{(k)}; \xi)) \end{array} \right\|^2 \\ & = \underbrace{(1 - \alpha_k)^2 \mathbb{E} \left\| \begin{array}{c} \hat{e}_i^{(k)} - \mathbb{E}_\xi \mathbf{e}_i(x^{(k-1)}; \xi) \\ + (\mathbb{E}_\xi \mathbf{e}_i(x^{(k-1)}; \xi) - \mathbb{E}_\xi \mathbf{e}_i(x^{(k)}; \xi)) \end{array} \right\|^2}_{\mathcal{F}_2} \\ & \quad + 2(1 - \alpha_k) \alpha_k \underbrace{\left\langle \begin{array}{c} \hat{e}_i^{(k)} - \mathbb{E}_\xi \mathbf{e}_i(x^{(k-1)}; \xi) \\ + \mathbb{E}_\xi \mathbf{e}_i(x^{(k-1)}; \xi) - \mathbb{E}_\xi \mathbf{e}_i(x^{(k)}; \xi) \end{array}, \hat{\mathbf{e}}_i(x^{(k)}; \xi_k; \hat{e}^{(k)}) - \mathbb{E}_\xi \mathbf{e}_i(x^{(k)}; \xi) \right\rangle}_{\mathcal{F}_4} \\ & \quad + \underbrace{\alpha_k^2 \mathbb{E}\|\hat{\mathbf{e}}_i(x^{(k)}; \xi_k; \hat{e}^{(k)}) - \mathbb{E}_\xi \mathbf{e}_i(x^{(k)}; \xi)\|^2}_{\mathcal{F}_3}, \end{aligned}$$

We define the three parts in the above inequality as  $\mathcal{F}_2, \mathcal{F}_3$  and  $\mathcal{F}_4$  so that we can bound them one by one. Firstly for  $\mathcal{F}_3$ , it can be easily bounded using (18), Assumption 1-2 and Assumption 1-4:

$$\begin{aligned} \mathcal{F}_3 &= \alpha_k^2 \mathbb{E}\|\hat{\mathbf{e}}_i(x^{(k)}; \xi_k; \hat{e}^{(k)}) - \mathbb{E}_\xi \mathbf{e}_i(x^{(k)}; \xi)\|^2 \\ & \leq \alpha_k^2 \mathbb{E}\|\hat{\mathbf{e}}_i(x^{(k)}; \xi_k; \hat{e}^{(k)}) - \mathbb{E}_\xi \hat{\mathbf{e}}_i(x^{(k)}; \xi; \hat{e}^{(k)})\| + \alpha_k^2 \mathbb{E}\|\mathbb{E}_\xi \hat{\mathbf{e}}_i(x^{(k)}; \xi; \hat{e}^{(k)}) - \mathbb{E}_\xi \mathbf{e}_i(x^{(k)}; \xi)\| \\ & \stackrel{\text{Assumption 1-2}}{\leq} \alpha_k^2 \sigma^2 + \alpha_k^2 \mathbb{E}\|\mathbb{E}_\xi \hat{\mathbf{e}}_i(x^{(k)}; \xi; \hat{e}^{(k)}) - \mathbb{E}_\xi \mathbf{e}_i(x^{(k)}; \xi)\| \\ & \stackrel{\text{Assumption 1-4}}{\leq} \alpha_k^2 \sigma^2 + \alpha_k^2 L \sum_{j=i+1}^n \mathbb{E}\|\hat{e}_j^{(k)} - \mathbb{E}_\xi \mathbf{e}_j(x^{(k)}; \xi)\|^2 \\ & \stackrel{(18)}{\leq} \alpha_k^2 \sigma^2 + n \alpha_k^2 L \mathcal{E}. \end{aligned} \quad (19)$$

We then take a look at  $\mathcal{F}_2$ . It can be bounded similar to what we did in (16) to bound  $\mathcal{F}_1$ .

$$\mathcal{F}_2 = (1 - \alpha_k)^2 \mathbb{E} \left\| \begin{array}{c} \hat{e}_i^{(k)} - \mathbb{E}_\xi \mathbf{e}_i(x^{(k-1)}; \xi) \\ + (\mathbb{E}_\xi \mathbf{e}_i(x^{(k-1)}; \xi) - \mathbb{E}_\xi \mathbf{e}_i(x^{(k)}; \xi)) \end{array} \right\|^2$$

$$\begin{aligned}
 &\leq (1 - \alpha_k)^2 \left( (1 + d) \mathbb{E} \|\hat{e}_i^{(k)} - \mathbb{E}_\xi \mathbf{e}_i(x^{(k-1)}; \xi)\|^2 + (1 + \frac{1}{d}) \mathbb{E} \|\mathbb{E}_\xi \mathbf{e}_i(x^{(k-1)}; \xi) - \mathbb{E}_\xi \mathbf{e}_i(x^{(k)}; \xi)\|^2 \right), \quad \forall d \in (0, 1) \\
 &\stackrel{d \leftarrow \alpha_k}{\leq} (1 - \alpha_k) \mathbb{E} \|\hat{e}_i^{(k)} - \mathbb{E}_\xi \mathbf{e}_i(x^{(k-1)}; \xi)\|^2 + \frac{1}{\alpha_k} \mathbb{E} \|\mathbb{E}_\xi \mathbf{e}_i(x^{(k-1)}; \xi) - \mathbb{E}_\xi \mathbf{e}_i(x^{(k)}; \xi)\|^2 \\
 &\stackrel{\text{Assumption 1-4}}{\leq} (1 - \alpha_k) \mathbb{E} \|\hat{e}_i^{(k)} - \mathbb{E}_\xi \mathbf{e}_i(x^{(k-1)}; \xi)\|^2 + \frac{L}{\alpha_k} (\mathbb{E} \|x^{(k)} - x^{(k-1)}\|^2). \tag{20}
 \end{aligned}$$

Finally we need to bound  $\mathcal{F}_4$ . This one is a litter harder than  $\mathcal{F}_2$  and  $\mathcal{F}_3$ . Different from what we were doing in (15), we no longer have the nice property  $\mathbf{e}_i(x; \xi) = \hat{\mathbf{e}}_i(x^{(k)}; \xi; \hat{e}^{(k)})$  since here we are dealing with  $i \neq n$ . We need to further split it and bound each part separately.

$$\begin{aligned}
 \mathcal{F}_4 &= \left\langle \begin{array}{l} \hat{e}_i^{(k)} - \mathbb{E}_\xi \mathbf{e}_i(x^{(k-1)}; \xi) \\ + \mathbb{E}_\xi \mathbf{e}_i(x^{(k-1)}; \xi) - \mathbb{E}_\xi \mathbf{e}_i(x^{(k)}; \xi) \end{array}, \mathbb{E}_\xi \hat{\mathbf{e}}_i(x^{(k)}; \xi; \hat{e}^{(k)}) - \mathbb{E}_\xi \mathbf{e}_i(x^{(k)}; \xi) \right\rangle \\
 &= \underbrace{\langle \hat{e}_i^{(k)} - \mathbb{E}_\xi \mathbf{e}_i(x^{(k-1)}; \xi), \mathbb{E}_\xi \hat{\mathbf{e}}_i(x^{(k)}; \xi; \hat{e}^{(k)}) - \mathbb{E}_\xi \mathbf{e}_i(x^{(k)}; \xi) \rangle}_{\mathcal{F}_6} \\
 &\quad + \underbrace{\langle \mathbb{E}_\xi \mathbf{e}_i(x^{(k-1)}; \xi) - \mathbb{E}_\xi \mathbf{e}_i(x^{(k)}; \xi), \mathbb{E}_\xi \hat{\mathbf{e}}_i(x^{(k)}; \xi; \hat{e}^{(k)}) - \mathbb{E}_\xi \mathbf{e}_i(x^{(k)}; \xi) \rangle}_{\mathcal{F}_7}. \tag{21}
 \end{aligned}$$

We first bound  $\mathcal{F}_7$ :

$$\begin{aligned}
 \mathcal{F}_7 &= \langle \mathbb{E}_\xi \mathbf{e}_i(x^{(k-1)}; \xi) - \mathbb{E}_\xi \mathbf{e}_i(x^{(k)}; \xi), \mathbb{E} \hat{\mathbf{e}}_i(x^{(k)}; \xi_k; \hat{e}^{(k)}) - \mathbb{E}_\xi \mathbf{e}_i(x^{(k)}; \xi) \rangle \\
 &\leq \underbrace{\|\mathbb{E}_\xi \mathbf{e}_i(x^{(k-1)}; \xi) - \mathbb{E}_\xi \mathbf{e}_i(x^{(k)}; \xi)\|}_{=O(\gamma_{k-1})} \|\mathbb{E} \hat{\mathbf{e}}_i(x^{(k)}; \xi_k; \hat{e}^{(k)}) - \mathbb{E}_\xi \mathbf{e}_i(x^{(k)}; \xi)\| \\
 &= O\left(\gamma_{k-1} \|\mathbb{E} \hat{\mathbf{e}}_i(x^{(k)}; \xi_k; \hat{e}^{(k)}) - \mathbb{E}_\xi \mathbf{e}_i(x^{(k)}; \xi)\|\right) \tag{22}
 \end{aligned}$$

$$\begin{aligned}
 &\stackrel{\text{Assumption 1-4}}{\leq} O\left(\gamma_{k-1} \sum_{j=i+1}^n \|\hat{e}_j^{(k)} - \mathbb{E}_\xi \mathbf{e}_j(x^{(k)}; \xi)\|\right) \\
 &\stackrel{(18)}{=} O\left(\gamma_{k-1} \sqrt{k^{-2\gamma+2a+\varepsilon} + k^{-a+\varepsilon}}\right) = O(\gamma_{k-1} (k^{-\gamma+a+\varepsilon/2} + k^{-a/2+\varepsilon/2})) \\
 &= O(k^{-2\gamma+a+\varepsilon/2} + k^{-\gamma-a/2+\varepsilon/2}), \tag{23}
 \end{aligned}$$

where in the second step we have  $\|\mathbb{E}_\xi \mathbf{e}_i(x^{(k-1)}; \xi) - \mathbb{E}_\xi \mathbf{e}_i(x^{(k)}; \xi)\| = O(\gamma_{k-1})$  since by Assumption 1-4 we obtain  $\|\mathbb{E}_\xi \mathbf{e}_i(x^{(k-1)}; \xi) - \mathbb{E}_\xi \mathbf{e}_i(x^{(k)}; \xi)\| \leq L \|x^{(k-1)} - x^{(k)}\|$ . Then it follows from the same argument as in (17).

After bounding  $\mathcal{F}_7$ , we start investigating  $\mathcal{F}_6$ . The last step follows the same procedure as in (22).

$$\begin{aligned}
 \mathcal{F}_6 &= \langle \hat{e}_i^{(k)} - \mathbb{E}_\xi \mathbf{e}_i(x^{(k-1)}; \xi), \mathbb{E} \mathbf{e}_i(x^{(k)}; \xi_k; \hat{e}^{(k)}) - \mathbb{E}_\xi \mathbf{e}_i(x^{(k)}; \xi) \rangle \\
 &\leq \frac{1}{2d_k} \|\hat{e}_i^{(k)} - \mathbb{E}_\xi \mathbf{e}_i(x^{(k-1)}; \xi)\|^2 + d_k \|\mathbb{E} \mathbf{e}_i(x^{(k)}; \xi_k; \hat{e}^{(k)}) - \mathbb{E}_\xi \mathbf{e}_i(x^{(k)}; \xi)\|^2, \quad \forall d_k > 0 \\
 &= \frac{1}{2d_k} \|\hat{e}_i^{(k)} - \mathbb{E}_\xi \mathbf{e}_i(x^{(k-1)}; \xi)\|^2 + d_k O(k^{-2\gamma+2a+\varepsilon} + k^{-a+\varepsilon}), \quad \forall d_k > 0. \tag{24}
 \end{aligned}$$

Finally plug (19), (20), (24) and (23) back into (21). By choosing  $d_k$  in (24) to be 1 we obtain:

$$\begin{aligned}
 &\mathbb{E} \|\hat{e}_i^{(k+1)} - \mathbb{E}_\xi \mathbf{e}_i(x^{(k)}; \xi)\|^2 \\
 &\leq \alpha_k^2 \sigma^2 + n \alpha_k^2 L \varepsilon \\
 &\quad + (1 - \alpha_k) \mathbb{E} \|\hat{e}_i^{(k)} - \mathbb{E}_\xi \mathbf{e}_i(x^{(k-1)}; \xi)\|^2 + \frac{L}{\alpha_k} (\mathbb{E} \|x^{(k)} - x^{(k-1)}\|^2) \\
 &\quad + 2(1 - \alpha_k) \alpha_k O(k^{-2\gamma+a+\varepsilon/2} + k^{-\gamma-a/2+\varepsilon/2}) \\
 &\quad + (1 - \alpha_k) \alpha_k \frac{1}{d_k} \|\hat{e}_i^{(k)} - \mathbb{E}_\xi \mathbf{e}_i(x^{(k-1)}; \xi)\|^2 + 2(1 - \alpha_k) \alpha_k d_k O(k^{-2\gamma+2a+\varepsilon} + k^{-a+\varepsilon})
 \end{aligned}$$

$$\begin{aligned}
 & \stackrel{d_k \leftarrow 1}{\leq} \alpha_k^2 \sigma^2 + n \alpha_k^2 L \mathcal{E} \\
 & + (1 - \alpha_k) \mathbb{E} \|\hat{e}_i^{(k)} - \mathbb{E}_\xi \mathbf{e}_i(x^{(k-1)}; \xi)\|^2 + \frac{L}{\alpha_k} (\mathbb{E} \|x^{(k)} - x^{(k-1)}\|^2) \\
 & + 2(1 - \alpha_k) \alpha_k O(k^{-2\gamma+a+\varepsilon/2} + k^{-\gamma-a/2+\varepsilon/2}) \\
 & + (1 - \alpha_k) \alpha_k \frac{1}{2} \|\hat{e}_i^{(k)} - \mathbb{E}_\xi \mathbf{e}_i(x^{(k-1)}; \xi)\|^2 + 4(1 - \alpha_k) \alpha_k O(k^{-2\gamma+2a+\varepsilon} + k^{-a+\varepsilon}) \\
 & \leq \left(1 - \frac{\alpha_k}{2}\right) \mathbb{E} \|\hat{e}_i^{(k)} - \mathbb{E}_\xi \mathbf{e}_i(x^{(k-1)}; \xi)\|^2 + \alpha_k^2 \sigma^2 + n \alpha_k^2 L \mathcal{E} + \frac{L \gamma_{k-1}^2}{\alpha_k} \mathcal{G}^2 \\
 & + 2(1 - \alpha_k) \alpha_k O(k^{-2\gamma+a+\varepsilon/2} + k^{-\gamma-a/2+\varepsilon/2}) + 4(1 - \alpha_k) \alpha_k O(k^{-2\gamma+2a+\varepsilon} + k^{-a+\varepsilon}) \\
 & = \left(1 - \frac{\alpha_k}{2}\right) \mathbb{E} \|\hat{e}_i^{(k)} - \mathbb{E}_\xi \mathbf{e}_i(x^{(k-1)}; \xi)\|^2 + \alpha_k^2 \sigma^2 \\
 & + n \alpha_k^2 L \mathcal{E} + \frac{L \gamma_{k-1}^2}{\alpha_k} \mathcal{G}^2 + O(k^{-2\gamma+a+\varepsilon} + k^{-2a+\varepsilon}). \tag{25}
 \end{aligned}$$

By combining (25) and Lemma 4 we obtain (8). (9) follows from (17) and (25).

**Proof to Theorem 2** It directly follows from the definition of Lipschitz condition of  $f$  that,

$$\begin{aligned}
 f(x^{(k+1)}) & \stackrel{\text{Assumption 1-4}}{\leq} f(x^{(k)}) + \langle \partial f(x^{(k)}), x^{(k+1)} - x^{(k)} \rangle + L \|x^{(k+1)} - x^{(k)}\|^2 \\
 & = f(x^{(k)}) + \langle \partial f(x^{(k)}), -\gamma_k g^{(k)} \rangle + L \|x^{(k+1)} - x^{(k)}\|^2 \\
 & = f(x^{(k)}) - \gamma_k \|\partial f(x^{(k)})\|^2 + \underbrace{\langle \partial f(x^{(k)}), -\gamma_k (g^{(k)} - \partial f(x^{(k)})) \rangle}_{\mathcal{T}_{\text{cross}}} + L \underbrace{\|x^{(k+1)} - x^{(k)}\|^2}_{\mathcal{T}_{\text{progress}}}. \tag{26}
 \end{aligned}$$

Here we define two new terms and try to bound the expectation of  $\mathcal{T}_{\text{cross}}$  and  $\mathcal{T}_{\text{progress}}$  separately as shown below:

$$\begin{aligned}
 \mathbb{E} \mathcal{T}_{\text{cross}} & = \mathbb{E} \langle \partial f(x^{(k)}), -\gamma_k (g^{(k)} - \partial f(x^{(k)})) \rangle \\
 & \leq \frac{2\gamma_k^2 L g}{\alpha_{k+1}} \mathbb{E} \|\partial f(x^{(k)})\|^2 + \frac{\alpha_{k+1}}{2Lg} \mathbb{E} \|g^{(k)} - \partial f(x^{(k)})\|^2 \\
 & \stackrel{\text{Assumption 1-3}}{\leq} \frac{2\gamma_k^2 L g}{\alpha_{k+1}} \mathbb{E} \|\partial f(x^{(k)})\|^2 + \frac{\alpha_{k+1}}{2} \sum_{i=1}^n \|\hat{e}_i^{(k+1)} - \mathbb{E}_\xi [\mathbf{e}_i(x^{(k)}; \xi)]\|^2, \tag{27}
 \end{aligned}$$

and

$$\mathbb{E} \mathcal{T}_{\text{progress}} = \mathbb{E} \|x_{k+1} - x_k\|^2 \stackrel{\text{Assumption 1-1}}{\leq} \gamma_k^2 \mathcal{G}^2. \tag{28}$$

With the help of (27) and (28), (26) becomes

$$\begin{aligned}
 \mathbb{E} f(x^{(k+1)}) & \leq \mathbb{E} f(x^{(k)}) - \gamma_k \mathbb{E} \|\partial f(x^{(k)})\|^2 \\
 & + \frac{2\gamma_k^2 L g}{\alpha_{k+1}} \mathbb{E} \|\partial f(x^{(k)})\|^2 + \frac{\alpha_{k+1}}{2} \sum_{i=1}^{n-1} \mathbb{E} \|\hat{e}_i^{(k+1)} - \mathbb{E}_{\xi_k} [e_i(x^{(k)}; \xi_k)]\|^2 + \gamma_k^2 L \mathcal{G}^2. \tag{29}
 \end{aligned}$$

To show how this converges, we define the following  $d_k$  to derive a recursive relation for (29):

$$d_k := f(x^{(k)}) + \sum_{i=1}^{n-1} \|\hat{e}_i^{(k+1)} - \mathbb{E}_{\xi_k} [e_i(x^{(k)}; \xi_k)]\|^2.$$

Then the recursive relation is derived by observing

$$\mathbb{E} d_{k+1} \leq \mathbb{E} f(x^{(k)}) - \gamma_k \mathbb{E} \|\partial f(x^{(k)})\|^2 + \frac{2\gamma_k^2 L g}{\alpha_{k+1}} \mathbb{E} \|\partial f(x^{(k)})\|^2 + \frac{\alpha_{k+1}}{2} \sum_{i=1}^{n-1} \mathbb{E} \|\hat{e}_i^{(k+1)} - \mathbb{E}_{\xi_k} [e_i(x^{(k)}; \xi_k)]\|^2 + \gamma_k^2 L \mathcal{G}^2$$

$$\begin{aligned}
 & + \sum_{i=1}^{n-1} \|\hat{e}_i^{(k+2)} - \mathbb{E}_{\xi_{k+1}}[e_i(x^{(k+1)}; \xi_{k+1})]\|^2 \\
 \stackrel{\text{Lemma 1}}{\leq} & \mathbb{E}f(x^{(k)}) - \gamma_k \mathbb{E}\|\partial f(x^{(k)})\|^2 \\
 & + \frac{2\gamma_k^2 Lg}{\alpha_{k+1}} \mathbb{E}\|\partial f(x^{(k)})\|^2 + \frac{\alpha_{k+1}}{2} \sum_{i=1}^{n-1} \mathbb{E}\|\hat{e}_i^{(k+1)} - \mathbb{E}_{\xi_k}[e_i(x^{(k)}; \xi_k)]\|^2 + \gamma_k^2 L\mathcal{G}^2 \\
 & + \sum_{i=1}^{n-1} \left( \left(1 - \frac{\alpha_{k+1}}{2}\right) \mathbb{E}\|\hat{e}_i^{(k+1)} - \mathbb{E}_{\xi} \mathbf{e}_i(x^{(k+1)}; \xi)\|^2 + C((k+1)^{-2\gamma+a+\varepsilon} + (k+1)^{-2a+\varepsilon}) \right) \\
 \leq & \mathbb{E}f(x^{(k)}) - \gamma_k \mathbb{E}\|\partial f(x^{(k)})\|^2 + \frac{2\gamma_k^2 Lg}{\alpha_{k+1}} \mathbb{E}\|\partial f(x^{(k)})\|^2 + \sum_{i=1}^{n-1} \mathbb{E}\|\hat{e}_i^{(k+1)} - \mathbb{E}_{\xi} \mathbf{e}_i(x^{(k)}; \xi)\|^2 + O(k^{-2\gamma+a+\varepsilon} + k^{-2a+\varepsilon}) \\
 = & \mathbb{E}d_k - \left( \gamma_k - \frac{2\gamma_k^2 Lg}{\alpha_{k+1}} \right) \mathbb{E}\|\partial f(x^{(k)})\|^2 + O(k^{-2\gamma+a+\varepsilon} + k^{-2a+\varepsilon}).
 \end{aligned}$$

Thus as long as  $a - 2\gamma < -1$ ,  $a < 1/2$  we can choose  $\varepsilon$  such that there exists a constant  $\mathcal{R}$ :

$$\begin{aligned}
 \mathbb{E}d_{K+1} & \leq \mathbb{E}d_0 - \sum_{k=0}^K \left( \gamma_k - \frac{2\gamma_k^2 Lg}{\alpha_{k+1}} \right) \mathbb{E}\|\partial f(x^{(k)})\|^2 + \mathcal{R} \\
 \sum_{k=0}^K \left( \gamma_k - \frac{2\gamma_k^2 Lg}{\alpha_{k+1}} \right) \mathbb{E}\|\partial f(x^{(k)})\|^2 & \leq \mathcal{R} + \mathbb{E}d_0 - \mathbb{E}d_{K+1} \\
 \frac{\gamma_k Lg}{\alpha_{k+1}} \stackrel{\leq \frac{1}{2}}{\rightarrow} \sum_{k=0}^K \gamma_k \mathbb{E}\|\partial f(x^{(k)})\|^2 & \leq \frac{2(\mathcal{R} + \mathbb{E}d_0 - \mathbb{E}d_{K+1})}{\sum_{k=0}^K \gamma_k}.
 \end{aligned}$$

By Assumption 1-5 we complete the proof.

**Proof to Corollary 3** With the given choice of  $\alpha_k$  and  $\gamma_k$  the prerequisites in Theorem 2 are satisfied.

Then by Theorem 2 there exists a constant  $\mathcal{H}$  (which may differ from the constant in Theorem 2) such that

$$\begin{aligned}
 \sum_{k=0}^K (k+2)^{-4/5} \mathbb{E}\|\partial f(x^{(k)})\|^2 & \leq \mathcal{H} \\
 \sum_{k=0}^K \mathbb{E}\|\partial f(x^{(k)})\|^2 & \leq \frac{\mathcal{H}}{(K+2)^{-4/5}} \\
 \frac{\sum_{k=0}^K \mathbb{E}\|\partial f(x^{(k)})\|^2}{K+2} & \leq \frac{\mathcal{H}}{(K+2)^{1/5}},
 \end{aligned}$$

completing the proof.
